# Supplementary material for: Accounting for technical noise in single-cell RNA-seq experiments
Source: Springer Nature journal article supplement (doi:10.1038/nmeth.2645), 2013-09-22
Supplement: 41592_2013_BFnmeth2645_MOESM313_ESM.pdf [file 41592_2013_BFnmeth2645_MOESM313_ESM.pdf]

# Accounting for technical noise in single-cell RNA-seq experiments – Supplement II

All analyses in the paper were carried out in the statistical programming language *R*. This Supplement documents the complete workflow to recreate all figures and numbers shown in the paper. It is extensively commented in order to demonstrate how our suggested analysis method is performed in practice and facilitate re-implementation by the user.

## Table of Contents

- [1 Preparations](#)
  - [1.1 Packages](#)
  - [1.2 Count table](#)
- [2 Analysis of the GL2 cell data](#)
  - [2.1 Preparing the count table](#)
  - [2.2 Normalization](#)
  - [2.3 Plot of normalized counts](#)
  - [2.4 Estimating technical noise](#)
    - [2.4.1 Plot of the fit](#)
  - [2.5 Testing plant genes for high variance](#)
    - [2.5.1 Plot](#)
    - [2.5.2 Table of highly variable genes](#)
  - [2.6 GO analysis](#)
    - [2.6.1 Results:](#)
  - [2.7 Heatmap](#)
  - [2.8 Read downsampling](#)
  - [2.9 Effect of transcript length](#)
- [3 Analysis of the QC cells](#)
  - [3.1 Preparing the count table.](#)
  - [3.2 Normalization](#)
  - [3.3 Plot of normalized counts](#)
  - [3.4 Estimating technical noise](#)
    - [3.4.1 Plot of the fit](#)
  - [3.5 Testing plant genes for high variance](#)
    - [3.5.1 Plot](#)
  - [3.6 Table of highly variable genes](#)
  - [3.7 GO analysis](#)
    - [3.7.1 Results:](#)
  - [3.8 Heatmap](#)
- [4 Analysis of the mouse cells](#)
  - [4.1 Count table and normalization](#)
  - [4.2 Fit technical noise](#)
  - [4.3 Test for high variance](#)
  - [4.4 A diagnostic plot](#)
  - [4.5 Plot of results](#)

## 1 Preparations

### 1.1 Packages

We load all R and Bioconductor packages that we need for this analysis:

```

library( DESeq )
library( genefilter )
library( EBImage )
library( statmod )
library( topGO )
library( org.At.tair.db )
options( max.print=300, width=100 )

```

The sessionInfo command gives the versions of R and all packages used in the present analysis run:

```
sessionInfo()
```

```

R version 2.15.3 (2013-03-01)
Platform: x86_64-pc-linux-gnu (64-bit)

locale:
 [1] LC_CTYPE=en_GB.UTF-8      LC_NUMERIC=C              LC_TIME=en_GB.UTF-8
 [4] LC_COLLATE=en_GB.UTF-8   LC_MONETARY=en_GB.UTF-8  LC_MESSAGES=en_GB.UTF-8
 [7] LC_PAPER=C               LC_NAME=C                 LC_ADDRESS=C
[10] LC_TELEPHONE=C          LC_MEASUREMENT=en_GB.UTF-8 LC_IDENTIFICATION=C

attached base packages:
[1] stats      graphics  grDevices  utils      datasets  methods    base

other attached packages:
 [1] org.At.tair.db_2.8.0 topGO_2.10.0      SparseM_0.96      GO.db_2.8.0
 [5] RSQLite_0.11.2      DBI_0.2-5        AnnotationDbi_1.20.3 graph_1.36.2
 [9] statmod_1.4.17      EBImage_4.0.0    genefilter_1.40.0 DESeq_1.11.6
[13] lattice_0.20-13     locfit_1.5-8     Biobase_2.18.0    BiocGenerics_0.4.0

loaded via a namespace (and not attached):
 [1] abind_1.4-0          annotate_1.36.0    geneplotter_1.36.0 grid_2.15.3        IRanges_1.18.1
 [6] jpeg_0.1-2          parallel_2.15.3   png_0.1-4         RColorBrewer_1.0-5 splines_2.15.1
[11] stats4_2.15.3      survival_2.36-14  tiff_0.1-3        tools_2.15.3       XML_3.95-0
[16] xtable_1.7-0

```

## 1.2 Count table

Supplementary Table 8 contains the raw read counts for the seven GL2 samples and the six QC samples. We save this table as a CSV file and load it into R.

```

fullCountTable <- read.csv( "Supplementary_Table_8.csv", header=TRUE, row.names=1 )
head( fullCountTable )

```

|           | QC1 | QC2 | QC3  | QC4 | QC5 | QC6 | GL2.1 | GL2.2 | GL2.3 | GL2.4 | GL2.5 | GL2.6 | GL2.7 |
|-----------|-----|-----|------|-----|-----|-----|-------|-------|-------|-------|-------|-------|-------|
| AT1G01010 | 0   | 0   | 0    | 0   | 0   | 0   | 64    | 18    | 0     | 0     | 87    | 381   | 13    |
| AT1G01020 | 2   | 0   | 7    | 708 | 0   | 0   | 422   | 602   | 125   | 58    | 181   | 148   | 122   |
| AT1G01030 | 0   | 0   | 0    | 0   | 0   | 0   | 0     | 0     | 0     | 0     | 0     | 0     | 0     |
| AT1G01040 | 0   | 0   | 0    | 459 | 533 | 42  | 205   | 2     | 577   | 201   | 0     | 0     | 112   |
| AT1G01046 | 0   | 0   | 0    | 0   | 0   | 0   | 0     | 0     | 0     | 0     | 0     | 0     | 0     |
| AT1G01050 | 2   | 166 | 1245 | 3   | 36  | 2   | 3865  | 5126  | 3804  | 1464  | 3072  | 3760  | 2112  |

Load the count table (new version with all seven GL2 cells), then subset to the samples from the GL2 cells (with "pGL" in the column name), and simplify the column names.

## 2 Analysis of the GL2 cell data

### 2.1 Preparing the count table

We subset the count table to only the columns referring to GL2 cells and clean up the column names.

```
countsAll <- fullCountTable[, substr( colnames(fullCountTable), 1, 3 ) == "GL2" ]
colnames(countsAll) <- gsub( "\\.", "-", colnames(countsAll) )
```

We split the count table in three sub-tables, one for the *A. thaliana* plant genes ("At"), one for the HeLa genes ("HeLa") and one for the IVT spikes ("Sp"). The first two letter of the gene IDs (row names) are used for this categorization.

```
geneTypes <- factor( c( AT="At", pG="pGIBS", EN="HeLa", ER="ERCC" ) [
  substr( rownames(countsAll), 1, 2 ) ] )
countsHeLa <- countsAll[ which( geneTypes=="HeLa" ), ]
countsAt <- countsAll[ which( geneTypes=="At" ), ]
countsSp <- countsAll[ which( geneTypes %in% c( "pGIBS", "ERCC" ) ), ]
```

We will not use the IVT spike data in this analysis. The other two tables now look as follows.

```
head( countsHeLa )
```

|                  | GL2-1 | GL2-2 | GL2-3 | GL2-4 | GL2-5 | GL2-6 | GL2-7 |
|------------------|-------|-------|-------|-------|-------|-------|-------|
| ENSG000000000003 | 581   | 1850  | 2169  | 392   | 2046  | 1225  | 166   |
| ENSG000000000005 | 0     | 0     | 0     | 0     | 0     | 0     | 0     |
| ENSG000000000419 | 393   | 1263  | 1411  | 296   | 1754  | 247   | 159   |
| ENSG000000000457 | 1     | 109   | 118   | 71    | 52    | 0     | 1     |
| ENSG000000000460 | 89    | 179   | 419   | 42    | 310   | 16    | 116   |
| ENSG000000000938 | 0     | 0     | 0     | 0     | 0     | 0     | 0     |

```
head( countsAt )
```

|           | GL2-1 | GL2-2 | GL2-3 | GL2-4 | GL2-5 | GL2-6 | GL2-7 |
|-----------|-------|-------|-------|-------|-------|-------|-------|
| AT1G01010 | 64    | 18    | 0     | 0     | 87    | 381   | 13    |
| AT1G01020 | 422   | 602   | 125   | 58    | 181   | 148   | 122   |
| AT1G01030 | 0     | 0     | 0     | 0     | 0     | 0     | 0     |
| AT1G01040 | 205   | 2     | 577   | 201   | 0     | 0     | 112   |
| AT1G01046 | 0     | 0     | 0     | 0     | 0     | 0     | 0     |
| AT1G01050 | 3865  | 5126  | 3804  | 1464  | 3072  | 3760  | 2112  |

For later use, we get a translation of gene IDs to gene symbols.

```
geneSymbolsAt <- rownames(countsAt)
names( geneSymbolsAt ) <- rownames(countsAt)
hasSymbol <- rownames(countsAt) %in% Lkeys( org.At.tairSYMBOL )
sytbl <- toTable( org.At.tairSYMBOL[ rownames(countsAt)[ hasSymbol ] ] )
sytbl <- sytbl[ !duplicated( sytbl$gene_id ), ]
geneSymbolsAt[ sytbl$gene_id ] <- sytbl$symbol
```

```
head( geneSymbolsAt )
```

|           |           |           |           |             |           |
|-----------|-----------|-----------|-----------|-------------|-----------|
| AT1G01010 | AT1G01020 | AT1G01030 | AT1G01040 | AT1G01046   | AT1G01050 |
| "ANAC001" | "ARV1"    | "NGA3"    | "ASU1"    | "AT1G01046" | "AtPPa1"  |

## 2.2 Normalization

We use the function "estimateSizeFactorsForMatrix" from DESeq to get size factors. This function calculates size factors as described in the DESeq paper (Anders and Huber, 2010) and in the Online Methods of the present paper.

```
sfHeLa <- estimateSizeFactorsForMatrix( countsHeLa )
sfAt <- estimateSizeFactorsForMatrix( countsAt )
```

See the size factors and their ratios:

```
rbind( HeLa = sfHeLa, At = sfAt, ratio = sfAt / sfHeLa )
```

|       | GL2-1     | GL2-2    | GL2-3     | GL2-4     | GL2-5     | GL2-6     | GL2-7     |
|-------|-----------|----------|-----------|-----------|-----------|-----------|-----------|
| HeLa  | 0.5173383 | 2.022511 | 2.8804054 | 0.8552699 | 2.0415875 | 0.9551039 | 0.3109511 |
| At    | 1.0234077 | 1.933931 | 1.7603544 | 1.3696320 | 0.8933595 | 0.8634580 | 0.5341586 |
| ratio | 1.9782176 | 0.956203 | 0.6111481 | 1.6014033 | 0.4375808 | 0.9040461 | 1.7178219 |

Divide by the size factors to get normalized counts. (Note the double use of "t" to make sure that columns, not rows, are divided by the size factors.)

```
nCountsHeLa <- t( t(countsHeLa) / sfHeLa )  
nCountsAt <- t( t(countsAt) / sfAt )
```

## 2.3 Plot of normalized counts

We use the following colours in our plots:

```
colHeLa <- "#00207040"  
colAt <- "#70500040"  
colAtHi <- "#B0901040"
```

Make a pairs plot of all GL-2 cells (Supplementary Figure 5).

```
pairs( log10( .1 + rbind( nCountsAt, nCountsHeLa ) ), pch=19, cex=.2,  
       col = c( rep( colAt, nrow(nCountsAt) ), rep( colHeLa, nrow(nCountsHeLa) ) ) )
```

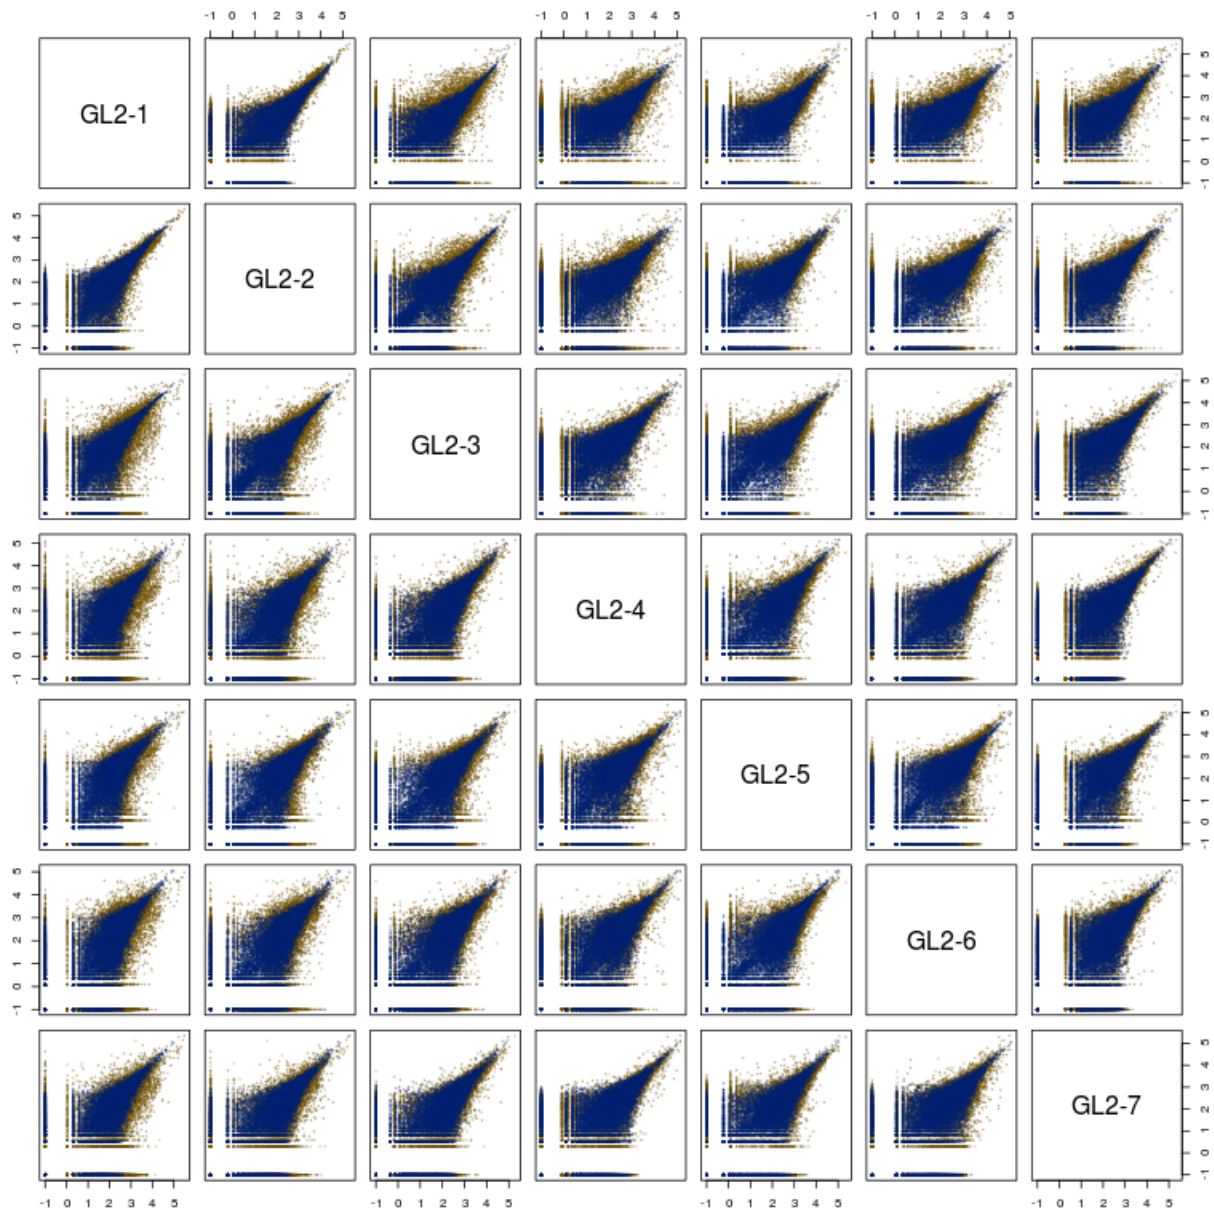

As the pairs plot is a bit large, we plot one comparison a bit bigger, namely cells 1 vs 3 (Figures 2a and 2b).

First, the following function makes nice axes etc. This function (and most of the code for plotting in the following sections) is somewhat specialized to our data. users wishing to follow this code to perform analyses of their own data may want to use simpler, more standard, R code for plotting.

```
geneScatterplot <- function( x, y, xlab, ylab, col ) {
  plot( NULL, xlim=c( -1, 6.2 ), ylim=c( -1, 6.2 ),
        xaxt="n", yaxt="n", xaxs="i", yaxs="i", asp=1,
        xlab=xlab, ylab=ylab )
  abline( a=-1, b=1, col = "lightgray", lwd=2 )
  abline( a=0, b=1, col = "lightgray", lwd=2 )
  abline( a=1, b=1, col = "lightgray", lwd=2 )
  abline( h=c(0,2,4,6), v=c(0,2,4,6), col = "lightgray", lwd=2 )
  points(
    ifelse( x > 0, log10(x), -.7 ),
    ifelse( y > 0, log10(y), -.7 ),
    pch=19, cex=.2, col = col )
  axis( 1, c( -.7, 0:6 ),
```

```

    c( "0", "1", "10", "100", expression(10^3), expression(10^4),
        expression(10^5), expression(10^6) ) )
axis( 2, c( -.7, 0:6 ),
      c( "0", "1", "10", "100", expression(10^3), expression(10^4),
        expression(10^5), expression(10^6) ), las=2 )
axis( 1, -.35, "//", tick=FALSE, line=-.7 )
axis( 2, -.35, "\\ \\ \\", tick=FALSE, line=-.7 )
}

```

Now make the two plots, first Figure 2a, then 2b:

```

geneScatterplot( nCountsHeLa[,1], nCountsHeLa[,3],
  "normalized read count, GL2 cell 1", "normalized read count, GL2 cell 3",
  colHeLa )

```

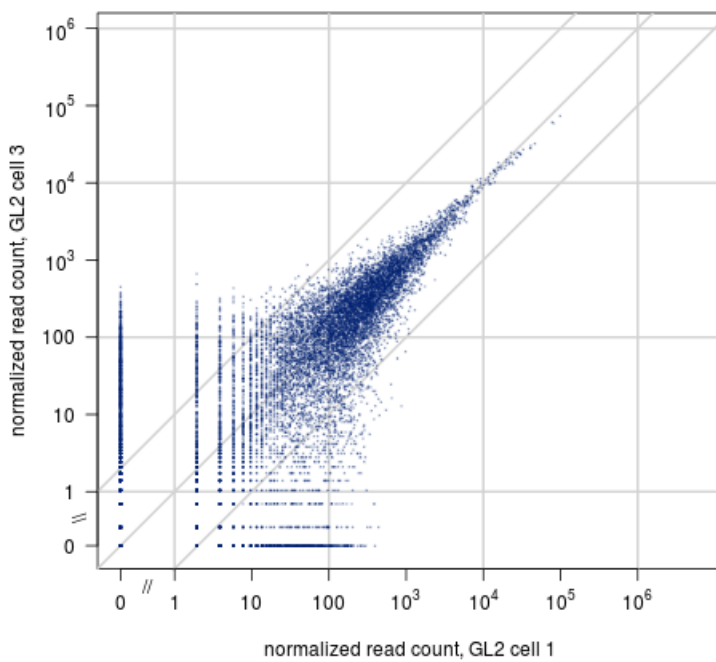

```

geneScatterplot( nCountsAt[,1], nCountsAt[,3],
  "normalized read count, GL2 cell 1", "normalized read count, GL2 cell 3",
  colAt )

```

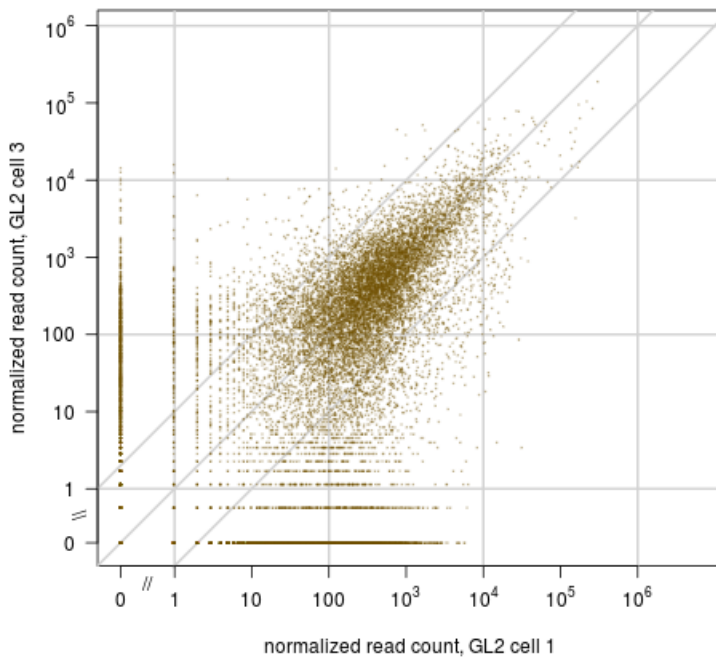

## 2.4 Estimating technical noise

We start by estimating the sample moments per gene.

```
meansHeLa <- rowMeans( nCountsHeLa )
varsHeLa <- rowVars( nCountsHeLa )
cv2HeLa <- varsHeLa / meansHeLa^2
```

Next, we define a minimum mean value to exclude genes with low mean and hence high CV from fit as they would otherwise skew it downwards (Online Methods and Supplementary Notes 6 and 7).

```
minMeanForFit <- unname( quantile( meansHeLa[ which( cv2HeLa > .3 ) ], .95 ) )
minMeanForFit
```

```
[1] 417.6733
```

Perform the fit of technical noise strength on average count. We regress  $cv2HeLa$  on  $1/meansForHeLa$ . We use the `glmGamFit` function from the `statmod` package to perform the regression as a GLM fit of the gamma family with log link. The `'cbind'` construct serves to produce a model matrix with an intercept.

```
useForFit <- meansHeLa >= minMeanForFit
fit <- glmGamFit( cbind( a0 = 1, a1tilde = 1/meansHeLa[useForFit] ),
  cv2HeLa[useForFit] )
fit$coefficients
```

```
      a0      a1tilde
0.04245659 179.66783886
```

To get the actual noise coefficients, we need to subtract  $\xi$  (see Supplementary Note 6 for the difference between  $a1tilde$  and  $a1$ ).

```
xi <- mean( 1 / sfHeLa )
```

```

a0 <- unname( fit$coefficients["a0"] )
a1 <- unname( fit$coefficients["altilde"] - xi )

c( a0, a1 )

```

```
[1] 0.04245659 178.42547279
```

### 2.4.1 Plot of the fit

The following code produces the plot of the fit shown in Figure 2c.

```

# Prepare the plot (scales, grid, labels, etc.)
plot( NULL, xaxt="n", yaxt="n",
      log="xy", xlim = c( 1e-1, 3e5 ), ylim = c( .005, 8 ),
      xlab = "average normalized read count", ylab = "squared coefficient of variation (CV^2)"
axis( 1, 10^(-1:5), c( "0.1", "1", "10", "100", "1000",
      expression(10^4), expression(10^5) ) )
axis( 2, 10^(-2:1), c( "0.01", "0.1", "1", "10" ), las=2 )
abline( h=10^(-2:1), v=10^(-1:5), col="#D0D0D0", lwd=2 )

# Add the data points
points( meansHeLa, cv2HeLa, pch=20, cex=.2, col=colHeLa )

# Plot the fitted curve
xg <- 10^seq( -2, 6, length.out=1000 )
lines( xg, (xi+a1)/xg + a0, col="#FF000080", lwd=3 )

# Plot quantile lines around the fit
df <- ncol(countsAt) - 1
lines( xg, ( (xi+a1)/xg + a0 ) * qchisq( .975, df ) / df,
      col="#FF000080", lwd=2, lty="dashed" )
lines( xg, ( (xi+a1)/xg + a0 ) * qchisq( .025, df ) / df,
      col="#FF000080", lwd=2, lty="dashed" )

```

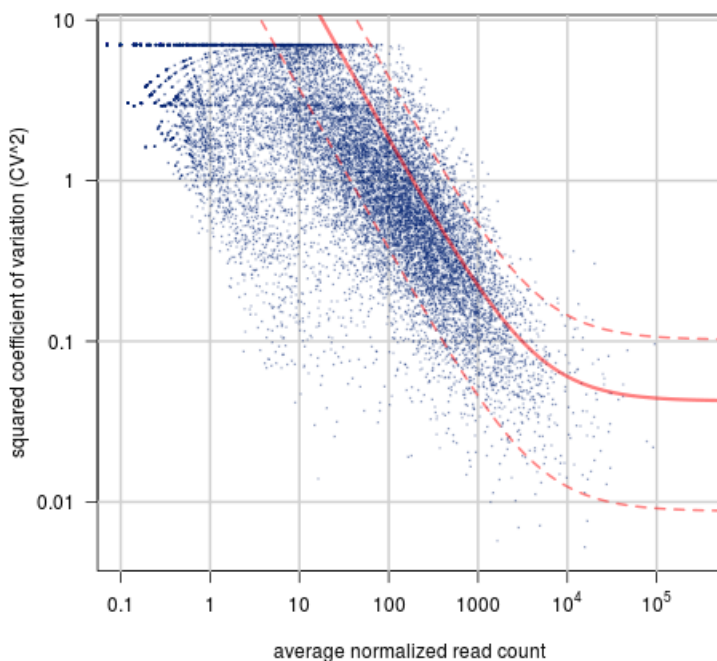



## 2.5 Testing plant genes for high variance

To perform the actual test (Online Methods, Supplementary Note 6), we start with again calculating the sample moments, now for the plant genes.

```
meansAt <- rowMeans( nCountsAt )
varsAt <- rowVars( nCountsAt )
cv2At <- varsAt / meansAt^2
```

The following is the term  $\Psi + a_0 * \Theta$ , that appears in the formula for  $\Omega$  (see formula in Online Methods).

```
psialtheta <- mean( 1 / sfAt ) + a1 * mean( sfHeLa / sfAt )
```

Now, we perform a one-sided test against the null hypothesis that the true variance is at most the technical variation plus biological variation with a CV of at most 50% ( $\text{minBiolDisp} = .5^2$ ).

```
minBiolDisp <- .5^2
```

Calculate  $\Omega$ , then perform the test, using the formula given in the Online methods and in Supplementary Note 6.

```
m <- ncol(countsAt)
cv2th <- a0 + minBiolDisp + a0 * minBiolDisp
testDenom <- ( meansAt * psialtheta + meansAt^2 * cv2th ) / ( 1 + cv2th/m )
p <- 1 - pchisq( varsAt * (m-1) / testDenom, m-1 )
```

Adjust for multiple testing with the Benjamini-Hochberg method, cut at 10%:

```
padj <- p.adjust( p, "BH" )
sig <- padj < .1
sig[is.na(sig)] <- FALSE
table( sig )
```

```
sig
FALSE TRUE
32726  876
```

### 2.5.1 Plot

Make a plot of the plant genes, highlighting the highly variable ones (Figure 2d).

```
# Prepare plot in the same manner as before
plot( NULL, xaxt="n", yaxt="n",
      log="xy", xlim = c( 1e-1, 3e5 ), ylim = c( .005, 8 ),
      xlab = "average normalized read count", ylab = "squared coefficient of variation (CV^2)"
axis( 1, 10^(-1:5), c( "0.1", "1", "10", "100", "1000",
      expression(10^4), expression(10^5) ) )
axis( 2, 10^(-2:1), c( "0.01", "0.1", "1", "10" ), las=2 )
abline( h=10^(-2:1), v=10^(-1:5), col="#D0D0D0", lwd=2 )

# Plot the plant genes, use a different color if they are highly variable
points( meansAt, cv2At, pch=20, cex=.2,
        col = ifelse( padj < .1, "#C0007090", colAt ) )

# Add the technical noise fit, as before
xg <- 10^seq( -2, 6, length.out=1000 )
lines( xg, (xi+a1)/xg + a0, col="#FF000080", lwd=3 )
```

```
# Add a curve showing the expectation for the chosen biological CV^2 threshold
lines( xg, psialtheta/xg + a0 + minBiolDisp, lty="dashed", col="#C0007090", lwd=3 )
```

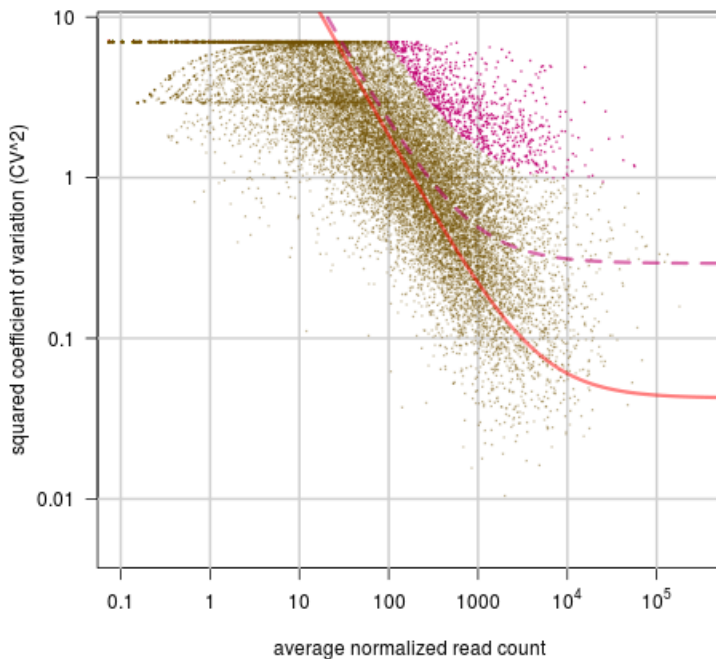

## 2.5.2 Table of highly variable genes

Most highly variable genes are strong only in one or two cells. To show this, we calculate the log ratio of the genes' expression in each cell to the mean:

```
log2RelExprAt <- log2( nCountsAt / meansAt )
```

We use this to produce a table of all significantly highly variable genes with some extra information, namely the mean normalized count, the log<sub>2</sub> fold change of each cell to this mean, and the information which cell has the strongest expression.

```
highVarTable <- data.frame(
  row.names = NULL,
  geneID = rownames(countsAt)[ sig ],
  geneSymbol = geneSymbolsAt[ sig ],
  meanNormCount = meansAt[ sig ],
  strongest = factor( colnames( log2RelExprAt ) [
    apply( log2RelExprAt[ sig, ], 1, which.max ) ] ),
  log2RelExprAt[ sig, ],
  check.names=FALSE )

head( highVarTable )
```

|   | geneID    | geneSymbol | meanNormCount | strongest | GL2-1      | GL2-2      | GL2-3     | GL2-4      |
|---|-----------|------------|---------------|-----------|------------|------------|-----------|------------|
| 1 | AT1G01100 | AT1G01100  | 2534.5561     | GL2-1     | 1.6221783  | 1.0724231  | -2.119163 | -2.3754433 |
| 2 | AT1G01140 | CIPK9      | 1584.2303     | GL2-6     | -Inf       | -Inf       | -1.293147 | -0.8690356 |
| 3 | AT1G01730 | AT1G01730  | 913.3887      | GL2-3     | -0.9406882 | 0.7364503  | 2.020811  | -3.3940557 |
| 4 | AT1G01740 | AT1G01740  | 837.6666      | GL2-3     | -0.5463967 | 1.3201552  | 1.876914  | -Inf       |
| 5 | AT1G02230 | ANAC004    | 208.7058      | GL2-4     | -0.5788364 | -5.1974315 | -4.273265 | 2.6442089  |
| 6 | AT1G02780 | emb2386    | 10119.6519    | GL2-1     | 1.7777659  | 0.4076499  | -2.532492 | -1.8231270 |
|   | GL2-5     | GL2-6      | GL2-7         |           |            |            |           |            |

```

1 -0.4417918 -1.4518590 -1.7662327
2 -10.4668792 2.5764124 -3.6588172
3 -3.4629446 -9.6232830 -0.8166829
4 -Inf -4.7979905 -3.1908625
5 -Inf -Inf -Inf
6 -0.4174578 -0.7624331 -1.1493215

```

We write out the table. It is given in the Supplement as Supplementary Table 2.

```
write.csv( highVarTable, file="highly_variant_genes_GL2.tsv", row.names=FALSE )
```

## 2.6 GO analysis

Next, we check whether the high-variance genes are enriched in certain GO categories using TopGO (Online Methods).

To work only with genes with uniform power to detect high or low variance, we include only genes with an average count above 300.

```
minCountForEnrichment <- 300
```

The following function performs the analysis. It takes a vector with gene IDs (here: all plant genes) and then two Boolean vectors of the same length, the first indicating which genes are to be included in the analysis (here: above the mean cut-off) and the second indicating which genes are significant (i.e., highly variable).

```

topGOAnalysis <- function( geneIDs, inUniverse, inSelection )
  sapply( c( "MF", "BP", "CC" ), function( ont ) {
    alg <- factor( as.integer( inSelection[inUniverse] ) )
    names(alg) <- geneIDs[inUniverse]
    tgd <- new( "topGOdata", ontology=ont, allGenes = alg, nodeSize=5,
      annot=annFUN.org, mapping="org.At.tair.db" )
    resultTopGO <- runTest(tgd, algorithm = "elim", statistic = "Fisher" )
    GenTable( tgd, resultTopGO, topNodes=15 ) },
  simplify=FALSE )

```

We use this to perform an enrichment analysis for the list of highly variable genes:

```

goResults <-
  topGOAnalysis(
    rownames(countsAt),
    meansAt >= minCountForEnrichment & !is.na(padj),
    padj < .1 )

```

### 2.6.1 Results:

How to correctly adjust for multiple testing in enrichment analyses is slightly controversial, so to keep it simple, we consider categories with raw p value below  $10^{-5}$  as clearly and below  $10^{-4}$  as maybe significant. Categories thus deemed significant have been taken from the results below and are listed in Supplementary Table 4.

```
goResults[["MF"]]
```

|   | GO.ID      | Term                                        | Annotated | Significant | Expected res |
|---|------------|---------------------------------------------|-----------|-------------|--------------|
| 1 | GO:0003735 | structural constituent of ribosome          | 212       | 140         | 23.24 <      |
| 2 | GO:0015250 | water channel activity                      | 17        | 9           | 1.86 2.      |
| 3 | GO:0003677 | DNA binding                                 | 391       | 69          | 42.86 2.     |
| 4 | GO:0003746 | translation elongation factor activity      | 18        | 7           | 1.97 0       |
| 5 | GO:0019843 | rRNA binding                                | 7         | 4           | 0.77 0       |
| 6 | GO:0016762 | xyloglucan:xyloglucosyl transferase acti... | 8         | 4           | 0.88 0       |
| 7 | GO:0016884 | carbon-nitrogen ligase activity, with gl... | 8         | 4           | 0.88 0       |
| 8 | GO:0003676 | nucleic acid binding                        | 706       | 123         | 77.39 0      |

|    |            |                                             |     |    |       |   |
|----|------------|---------------------------------------------|-----|----|-------|---|
| 9  | GO:0003723 | RNA binding                                 | 229 | 44 | 25.10 | 0 |
| 10 | GO:0016847 | 1-aminocyclopropane-1-carboxylate syntha... | 6   | 3  | 0.66  | 0 |
| 11 | GO:0004553 | hydrolase activity, hydrolyzing O-glycos... | 86  | 16 | 9.43  | 0 |
| 12 | GO:0016798 | hydrolase activity, acting on glycosyl b... | 94  | 17 | 10.30 | 0 |
| 13 | GO:0016684 | oxidoreductase activity, acting on perox... | 28  | 7  | 3.07  | 0 |
| 14 | GO:0004601 | peroxidase activity                         | 28  | 7  | 3.07  | 0 |
| 15 | GO:0003690 | double-stranded DNA binding                 | 8   | 3  | 0.88  | 0 |

```
goResults[["CC"]]
```

|    | GO.ID      | Term                                        | Annotated | Significant | Expected re |    |
|----|------------|---------------------------------------------|-----------|-------------|-------------|----|
| 1  | GO:0022625 | cytosolic large ribosomal subunit           | 92        | 78          | 10.04       | <  |
| 2  | GO:0022627 | cytosolic small ribosomal subunit           | 69        | 48          | 7.53        | <  |
| 3  | GO:0005730 | nucleolus                                   | 161       | 71          | 17.56       | 5. |
| 4  | GO:0000786 | nucleosome                                  | 41        | 33          | 4.47        | 3. |
| 5  | GO:0009506 | plasmodesma                                 | 478       | 108         | 52.15       | 5. |
| 6  | GO:0005618 | cell wall                                   | 255       | 52          | 27.82       | 3. |
| 7  | GO:0022626 | cytosolic ribosome                          | 207       | 139         | 22.58       | 9. |
| 8  | GO:0005576 | extracellular region                        | 126       | 24          | 13.75       | 0  |
| 9  | GO:0005774 | vacuolar membrane                           | 334       | 51          | 36.44       | 0  |
| 10 | GO:0005634 | nucleus                                     | 919       | 165         | 100.26      | 0  |
| 11 | GO:0009507 | chloroplast                                 | 745       | 100         | 81.28       | 0  |
| 12 | GO:0005773 | vacuole                                     | 532       | 82          | 58.04       | 0  |
| 13 | GO:0009536 | plastid                                     | 784       | 102         | 85.53       | 0  |
| 14 | GO:0048046 | apoplast                                    | 102       | 17          | 11.13       | 0  |
| 15 | GO:0005853 | eukaryotic translation elongation factor... | 5         | 2           | 0.55        | 0  |

```
goResults[["BP"]]
```

|    | GO.ID      | Term                                        | Annotated | Significant | Expected re |    |
|----|------------|---------------------------------------------|-----------|-------------|-------------|----|
| 1  | GO:0001510 | RNA methylation                             | 105       | 79          | 11.42       | <  |
| 2  | GO:0006412 | translation                                 | 448       | 155         | 48.74       | <  |
| 3  | GO:0042254 | ribosome biogenesis                         | 108       | 63          | 11.75       | 7. |
| 4  | GO:0006334 | nucleosome assembly                         | 45        | 34          | 4.90        | 2. |
| 5  | GO:0009220 | pyrimidine ribonucleotide biosynthetic p... | 53        | 29          | 5.77        | 3. |
| 6  | GO:0006364 | rRNA processing                             | 39        | 19          | 4.24        | 4. |
| 7  | GO:0006414 | translational elongation                    | 33        | 14          | 3.59        | 3. |
| 8  | GO:0042545 | cell wall modification                      | 79        | 22          | 8.59        | 2. |
| 9  | GO:0009664 | plant-type cell wall organization           | 106       | 26          | 11.53       | 4. |
| 10 | GO:0000724 | double-strand break repair via homologou... | 9         | 6           | 0.98        | 0. |
| 11 | GO:0006164 | purine nucleotide biosynthetic process      | 50        | 15          | 5.44        | 0. |
| 12 | GO:1901070 | guanosine-containing compound biosynthet... | 5         | 4           | 0.54        | 0. |
| 13 | GO:0009646 | response to absence of light                | 20        | 8           | 2.18        | 0. |
| 14 | GO:0009955 | adaxial/abaxial pattern specification       | 12        | 6           | 1.31        | 0. |
| 15 | GO:0000462 | maturation of SSU-rRNA from tricistronic... | 6         | 4           | 0.65        | 0. |

## 2.7 Heatmap

This section describes how Supplementary Figure 9a was produced.

In order to get the genes aligned to the plot's pixels, we use the following custom heatmap function instead of R's standard one. It expects a matrix with values in the range given by 'zlim' (everything outside this range will be pulled in to its margins), a number pair for zlim, a color palette, and two integers for the width and height in pixels that should be used to represent each matrix element.

```
pixelHeatmap <- function( m, zlim=range(m), col=colorRampPalette(c("blue","orange"))(100),
  pxWidth=1, pxHeight=1 ) {
  col <- col2rgb(col)/255
  mn <- ( m - zlim[1] ) / ( zlim[2] - zlim[1] )
  mn[ mn<0 ] <- 0
  mn[ mn>1 ] <- 1
  mn <- 1 + round( mn * (ncol(col)-1) )
```

```

a <- array( NA_real_, c( nrow(m)*pxWidth, ncol(m)*pxHeight, 3 ) )
for( i in 1:nrow(mn) )
  for( j in 1:ncol(mn) )
    a[ ((i-1)*pxWidth)+1 : (i*pxWidth), ((j-1)*pxHeight)+1 : (j*pxHeight), ] <-
      rep( col[ , mn[ i, j ] ] , each = pxWidth*pxHeight )
Image( a, colormode="color" )
}

```

We use this to plot the relative expressions of the highly variable genes.

```

relSig <- log2RelExprAt[ sig, ]
relSig[ relSig < -4 ] <- -4
ord <- hclust(dist(relSig))$order
hmSig <- pixelHeatmap( t( relSig[ord,] ), zlim=c( -3, 3 ), pxWidth=30,
  col=colorRampPalette(c("blue","gray","red"))(100) )

```

```

writeImage( hmSig, "variableGenes_heatmap.png" )

```

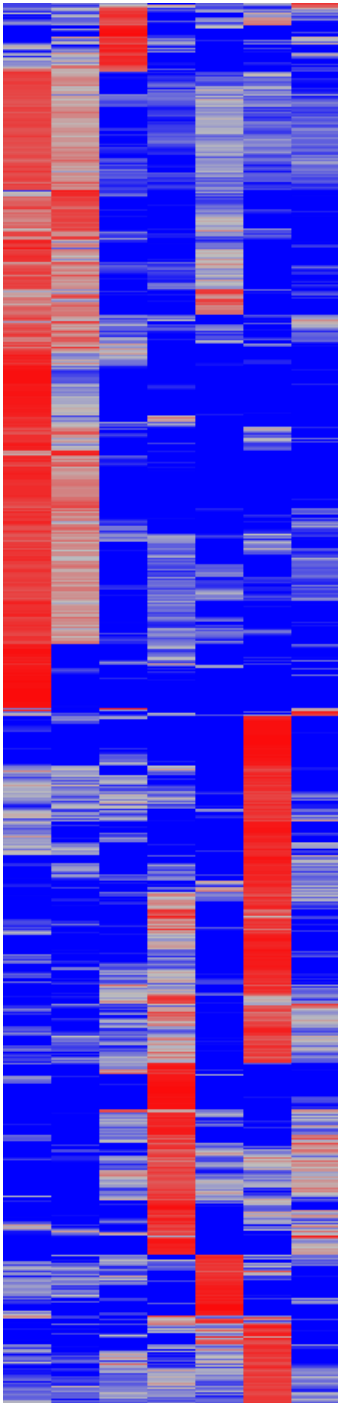

We annotate this heatmap with a few hand-picked GO terms:

```
someGOTerms <- c( "GO:0003735", "GO:0001510", "GO:0005730", "GO:0009506",
  "GO:0003677", "GO:0000786", "GO:0012505", "GO:0009269" )

unnname( t( sapply( someGOTerms, function(x) toTable(GOTERM[ x ])[1,2:3] ) ) )
```

```
      [,1]      [,2]
[1,] "GO:0003735" "structural constituent of ribosome"
[2,] "GO:0001510" "RNA methylation"
[3,] "GO:0005730" "nucleolus"
[4,] "GO:0009506" "plasmodesma"
[5,] "GO:0003677" "DNA binding"
[6,] "GO:0000786" "nucleosome"
```

```
[7,] "GO:0012505" "endomembrane system"
[8,] "GO:0009269" "response to desiccation"
```

For these, make a second heatmap indicating the genes' membership.

```
sigInGO <- sapply( unname(someGOTerms), function(go)
  rownames(countsAt)[sig] %in% org.At.tairGO2TAIR[[ go ]] )

hmGO <- pixelHeatmap( t(sigInGO[ ord, ]), col=c( "lightgray", "darkgreen" ), pxWidth=20 )
```

Put the two heatmaps next to each other.

```
spacer <- Image( array( .9, 30 * 3 * sum(sig), dim=c( 30, sum(sig), 3 ) ), colormode="color" )
writeImage(
  Image( abind::abind( hmSig, spacer, hmGO, along=1 ), colormode="color" ),
  files="heatmap.png" )
```

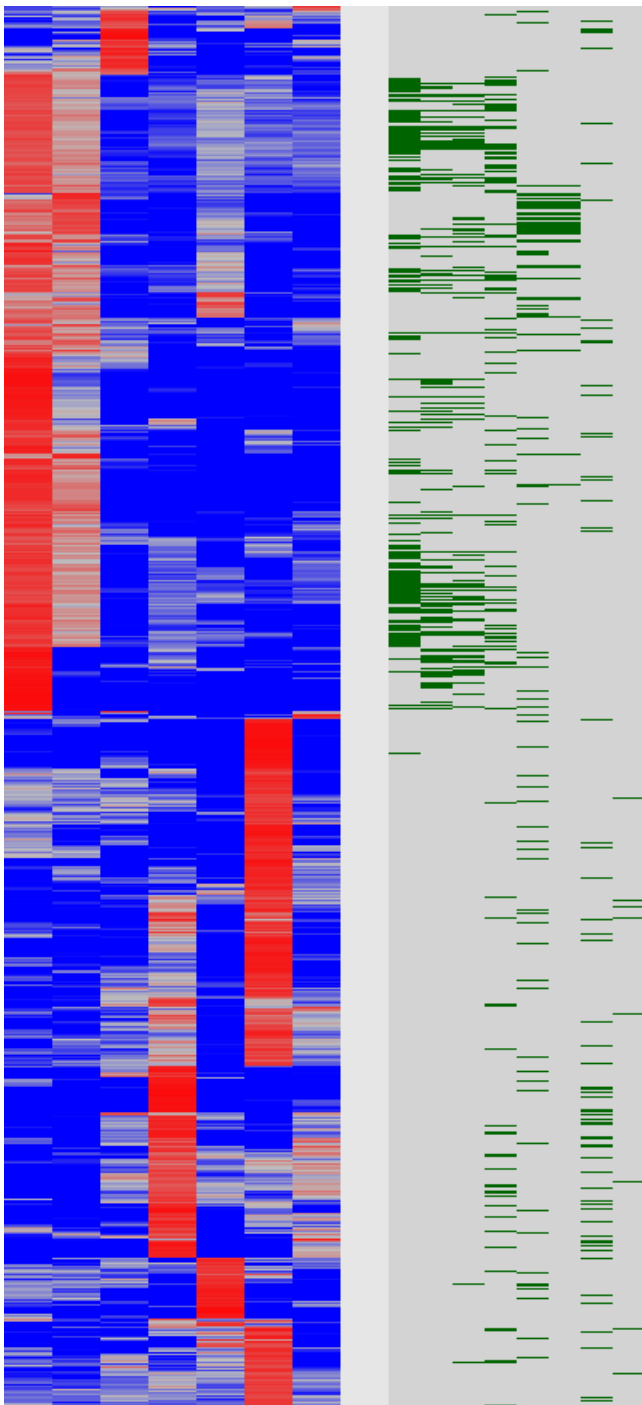

## 2.8 Read downsampling

To show that we could have worked with fewer reads (as claimed in Supplementary Note 9), we downsample all read counts to 1/5 using draws from binomial distributions

```
dsfrac <- 0.2
countsAt_ds <- apply( countsAt, 1:2, function(k) rbinom( 1, k, dsfrac ) )
countsHeLa_ds <- apply( countsHeLa, 1:2, function(k) rbinom( 1, k, dsfrac ) )
```

We redo the analysis as before.

First, the normalization:



```
sfAt_ds <- estimateSizeFactorsForMatrix( countsAt_ds )
sfHeLa_ds <- estimateSizeFactorsForMatrix( countsHeLa_ds )

nCountsAt_ds <- t( t(countsAt_ds) / sfAt_ds )
nCountsHeLa_ds <- t( t(countsHeLa_ds) / sfHeLa_ds )
```

Next, the technical noise fit:

```
meansHeLa_ds <- rowMeans( nCountsHeLa_ds )
varsHeLa_ds <- rowVars( nCountsHeLa_ds )
cv2HeLa_ds <- varsHeLa_ds / meansHeLa_ds^2

minMeanForFit_ds <- unname( quantile( meansHeLa_ds[ which( cv2HeLa_ds > .3 ) ], .95 ) )
useForFit_ds <- meansHeLa_ds >= minMeanForFit_ds
fit_ds <- glmGamFit( cbind( a0 = 1, altilde = 1/meansHeLa_ds[useForFit_ds] ),
  cv2HeLa_ds[useForFit_ds] )

xi_ds <- mean( 1 / sfHeLa_ds )
a0_ds <- unname( fit_ds$coefficients["a0"] )
a1_ds <- unname( fit_ds$coefficients["altilde"] - xi_ds )

c( a0_ds, a1_ds )
```

```
[1] 0.03706779 35.43892577
```

Note how this a0 stayed roughly the same, and a1 got reduced according to the downsampling fraction; compare with

```
c( a0, a1 * dsfrac )
```

```
[1] 0.04245659 35.68509456
```

Finally, the test for high variability.

```
meansAt_ds <- rowMeans( nCountsAt_ds )
varsAt_ds <- rowVars( nCountsAt_ds )

psialtheta_ds <- mean( 1 / sfAt_ds ) + a1_ds * mean( sfHeLa_ds / sfAt_ds )
cv2th_ds <- a0_ds + minBiolDisp + a0_ds * minBiolDisp
testDenom_ds <- ( meansAt_ds * psialtheta_ds + meansAt_ds^2 * cv2th_ds ) / ( 1 + cv2th_ds/m

p_ds <- 1 - pchisq( varsAt_ds * (m-1) / testDenom_ds, m-1 )
padj_ds <- p.adjust( p_ds, "BH" )
```

Compare the results and calculate the overlap:

```
addmargins( table( all_reads = padj < .1, subsampled = padj_ds < .1 ) )
```

|           | subsampled |      |       |
|-----------|------------|------|-------|
| all_reads | FALSE      | TRUE | Sum   |
| FALSE     | 17313      | 64   | 17377 |
| TRUE      | 27         | 849  | 876   |
| Sum       | 17340      | 913  | 18253 |

Also, a plot of the p values (Supplementary Figure 12; note that this plots always changes slightly due to the random nature of the downsampling)

```
plot( p, p_ds,
  log="xy", pch=19, cex=.2, col="#00000040",
  xlab = "p value from full data", ylab="p value from subsampled data" )
```

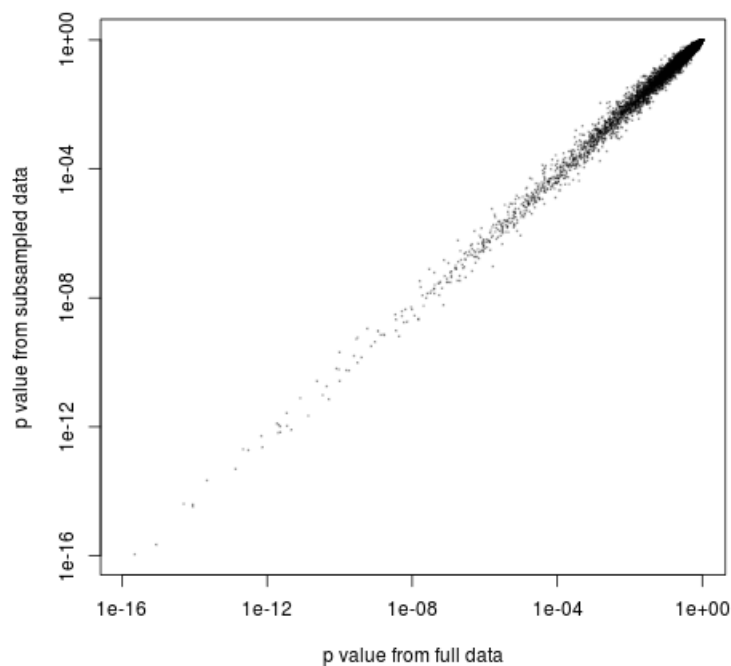

## 2.9 Effect of transcript length

Here, we test whether it is beneficial to normalize counts for transcript length.

We load a table of transcript lengths for the human genome (given in Supplementary Table 9):

```
a <- read.csv( "Supplementary_Table_9.csv" )
humanGeneLengths <- a$length
names(humanGeneLengths) <- a$geneID
head(humanGeneLengths)
```

```
ENSG00000000003  ENSG00000000005  ENSG000000000419  ENSG000000000457  ENSG000000000460  ENSG000000000000
      2968             1610             1207             3844             6354
```

We use this to convert the normalized counts to normalized counts per kilobase transcript length.

```
nCountsHeLaPK <- nCountsHeLa / humanGeneLengths[rownames(nCountsHeLa)] * 1000
```

We redo the fit using this data (removing a single gene for which we are missing length information):

```
useForFitPK <- useForFit
useForFitPK["ENSG00000242125"] <- FALSE
meansHeLaPK <- rowMeans( nCountsHeLaPK )
fitPK <- glmGamFit( cbind( a0 = 1, altilde = 1/meansHeLaPK[useForFitPK] ),
  cv2HeLa[useForFitPK] )
```

We compare the residual variances from both fits:

```
totalVariance <- var( log( cv2HeLa[useForFit] ) )
residualVariance <- var( log( cv2HeLa[useForFit] ) - log( fitted.values(fit) ) )

totalVariancePK <- var( log( cv2HeLa[useForFitPK] ) )
residualVariancePK <- var( log( cv2HeLa[useForFitPK] ) - log( fitted.values(fitPK) ) )
```

Here are the variances and their ratios:

```
c( residualVariance, totalVariance, residualVariance / totalVariance )
c( residualVariancePK, totalVariancePK, residualVariancePK / totalVariancePK )
```

```
[1] 0.5438976 0.8333216 0.6526863
[1] 0.6610947 0.8334789 0.7931751
```

Here, the length-normalization increases the residual variance, i.e., is not beneficial.

Note: These residual variance fractions may seem large. However, bear in mind that even a perfect fit cannot explain the sampling variance of the log  $CV^2$  estimates, which approximately have variance  $2/(m-1)$ , i.e. account for the following fraction of the total variance:

```
2/(m-1) / totalVariance
```

```
[1] 0.4000057
```

This is more than half of the residual variance fraction. Hence, if we subtract this from the total variance to get the total "explainable" variance, we get a rather large fraction of explained variance:

```
explainedVariance <- totalVariance - residualVariance
explainableVariance <- totalVariance - 2/(m-1)

explainedVariance / explainableVariance
```

```
[1] 0.5788616
```

The same for the length-divided fit:

```
explainedVariancePK <- totalVariancePK - residualVariancePK
explainableVariancePK <- totalVariancePK - 2/(m-1)

explainedVariancePK / explainableVariancePK
```

```
[1] 0.344668
```

Finally, we save the current state, for convenience.

```
save.image( "GL2_analysis_image.RData" )
```

### 3 Analysis of the QC cells

The analysis of the QC cells is done in exactly the same way as for the GL2 cells. Hence, we give here the code, essentially the same code as before, without much comments.

As the code here re-uses the variable names used in the previous part, we clear the global environment in order to start with a clean slate.

```
rm( list=ls() )
```

#### 3.1 Preparing the count table.

We read in the full count table, as before, and now subset to only the columns referring to QC cells.

```
fullCountTable <- read.csv( "Supplementary_Table_8.csv", header=TRUE, row.names=1 )
countsAll <- fullCountTable[, substr( colnames(fullCountTable), 1, 2 ) == "QC" ]
```

We split the count table again into three sub-tables

```
geneTypes <- factor( c( AT="At", pG="pGIBS", EN="HeLa", ER="ERCC" ) [
  substr( rownames(countsAll), 1, 2 ) ] )
countsHeLa <- countsAll[ which( geneTypes=="HeLa" ), ]
countsAt <- countsAll[ which( geneTypes=="At" ), ]
countsSp <- countsAll[ which( geneTypes %in% c( "pGIBS", "ERCC" ) ), ]
```

Again, the gene symbols:

```
geneSymbolsAt <- rownames(countsAt)
names( geneSymbolsAt ) <- rownames(countsAt)
hasSymbol <- rownames(countsAt) %in% Lkeys( org.At.tairSYMBOL )
sytbl <- toTable( org.At.tairSYMBOL[ rownames(countsAt)[ hasSymbol ] ] )
sytbl <- sytbl[ !duplicated( sytbl$gene_id ), ]
geneSymbolsAt[ sytbl$gene_id ] <- sytbl$symbol

head( geneSymbolsAt )
```

```
AT1G01010  AT1G01020  AT1G01030  AT1G01040  AT1G01046  AT1G01050
"ANAC001"  "ARV1"      "NGA3"     "ASU1"    "AT1G01046"  "AtPPa1"
```

### 3.2 Normalization

As before:

```
sfHeLa <- estimateSizeFactorsForMatrix( countsHeLa )
sfAt <- estimateSizeFactorsForMatrix( countsAt )
```

See the size factors and their ratios:

```
rbind( HeLa = sfHeLa, At = sfAt, ratio = sfAt / sfHeLa )
```

```
      QC1      QC2      QC3      QC4      QC5      QC6
HeLa 1.287133 0.8061698 0.8695366 1.206279 1.1365133 1.2384236
At   1.595883 1.2135275 1.2409527 2.315439 0.9654965 0.6946031
ratio 1.239875 1.5053001 1.4271426 1.919489 0.8495251 0.5608768
```

Divide by the size factors to get normalized counts

```
nCountsHeLa <- t( t(countsHeLa) / sfHeLa )
nCountsAt <- t( t(countsAt) / sfAt )
```

### 3.3 Plot of normalized counts

The plot shown in Supplementary Figure 6.

```
colHeLa <- "#00207040"
colAt <- "#70500040"
colAtHi <- "#B0901040"
```

```
pairs( log10( .1 + rbind( nCountsAt, nCountsHeLa ) ), pch=19, cex=.2,
  col = c( rep( colAt, nrow(nCountsAt) ), rep( colHeLa, nrow(nCountsHeLa) ) ) )
```

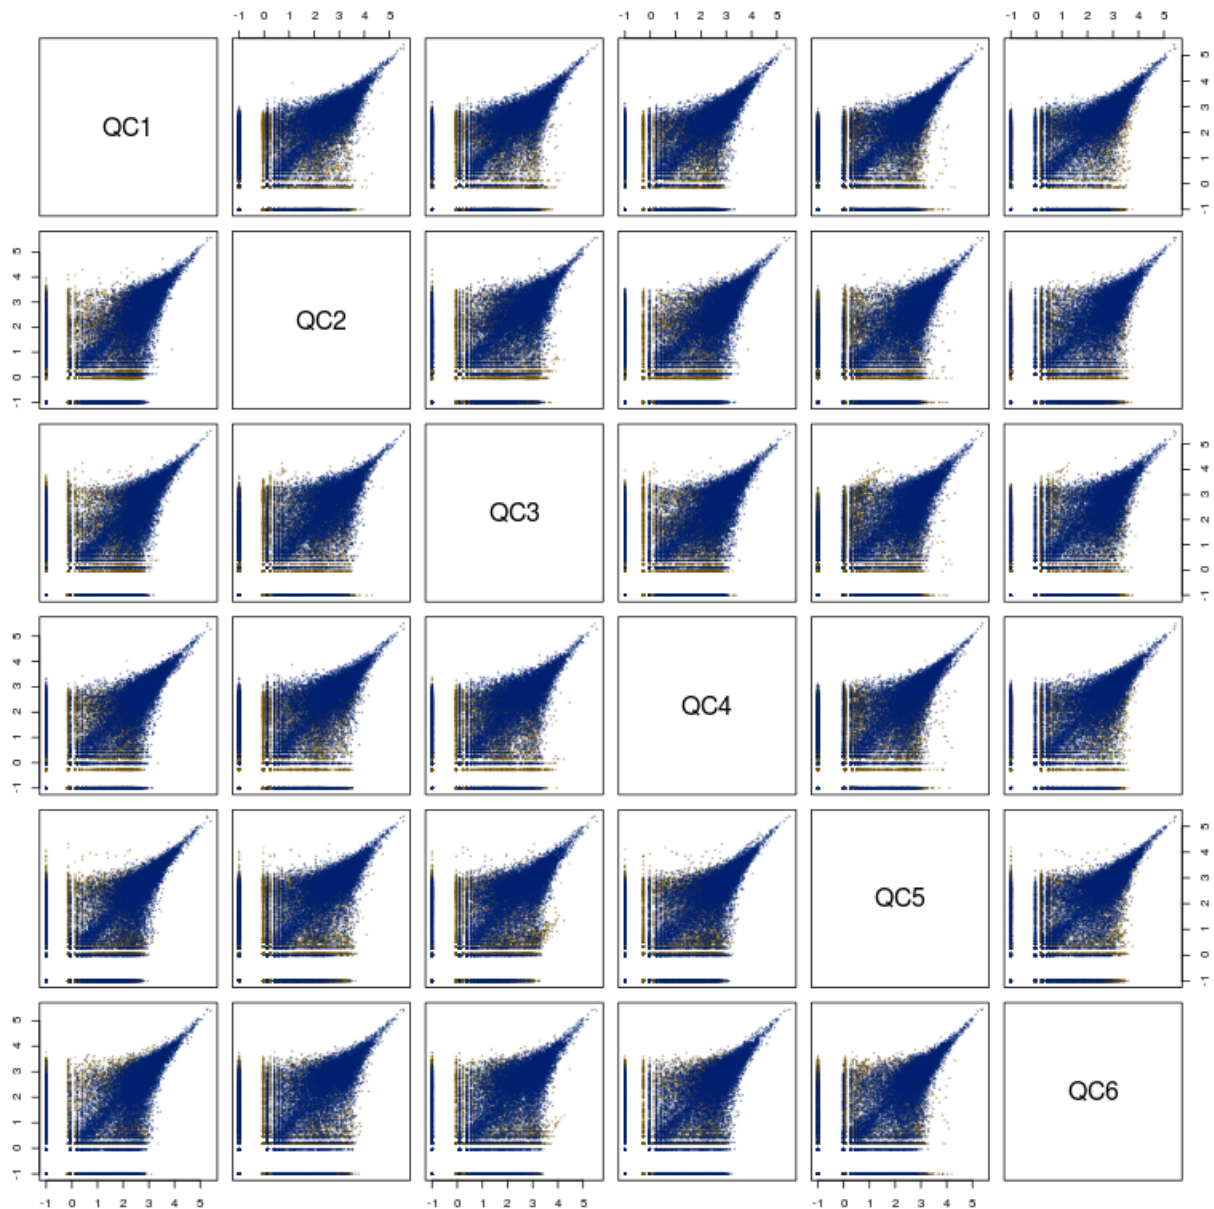

### 3.4 Estimating technical noise

Estimate sample moments per gene.

```
meansHeLa <- rowMeans( nCountsHeLa )
varsHeLa <- rowVars( nCountsHeLa )
cv2HeLa <- varsHeLa / meansHeLa^2
```

Find the minimum mean value for the fit.

```
minMeanForFit <- unname( quantile( meansHeLa[ which( cv2HeLa > .3 ) ], .95 ) )
minMeanForFit
```

```
[1] 1445.372
```

Perform the fit.

```

useForFit <- meansHeLa >= minMeanForFit
fit <- glmGam.fit( cbind( a0 = 1, altilde = 1/meansHeLa[useForFit] ),
  cv2HeLa[useForFit] )
fit$coefficients

```

```

      a0      altilde
0.03848821 675.46699263

```

Subtract Xi.

```

xi <- mean( 1 / sfHeLa )

a0 <- unname( fit$coefficients["a0"] )
a1 <- unname( fit$coefficients["altilde"] - xi )

c( a0, a1 )

```

```
[1] 0.03848821 674.51970093
```

### 3.4.1 Plot of the fit

A plot of the fit, code as before (Supplementary Figure 8a).

```

# Prepare the plot (scales, grid, labels, etc.)
plot( NULL, xaxt="n", yaxt="n",
  log="xy", xlim = c( 1e-1, 3e5 ), ylim = c( .005, 8 ),
  xlab = "average normalized read count", ylab = "squared coefficient of variation (CV^2)"
axis( 1, 10^(-1:5), c( "0.1", "1", "10", "100", "1000",
  expression(10^4), expression(10^5) ) )
axis( 2, 10^(-2:1), c( "0.01", "0.1", "1", "10" ), las=2 )
abline( h=10^(-2:1), v=10^(-1:5), col="#D0D0D0" )

# Add the data points
points( meansHeLa, cv2HeLa, pch=20, cex=.2, col=colHeLa )

# Plot the fitted curve
xg <- 10^seq( -2, 6, length.out=1000 )
lines( xg, (xi+a1)/xg + a0, col="#FF000080", lwd=3 )

# Plot quantile lines around the fit
df <- ncol(countsAt) - 1
lines( xg, ( (xi+a1)/xg + a0 ) * qchisq( .975, df ) / df,
  col="#FF000080", lwd=2, lty="dashed" )
lines( xg, ( (xi+a1)/xg + a0 ) * qchisq( .025, df ) / df,
  col="#FF000080", lwd=2, lty="dashed" )

```

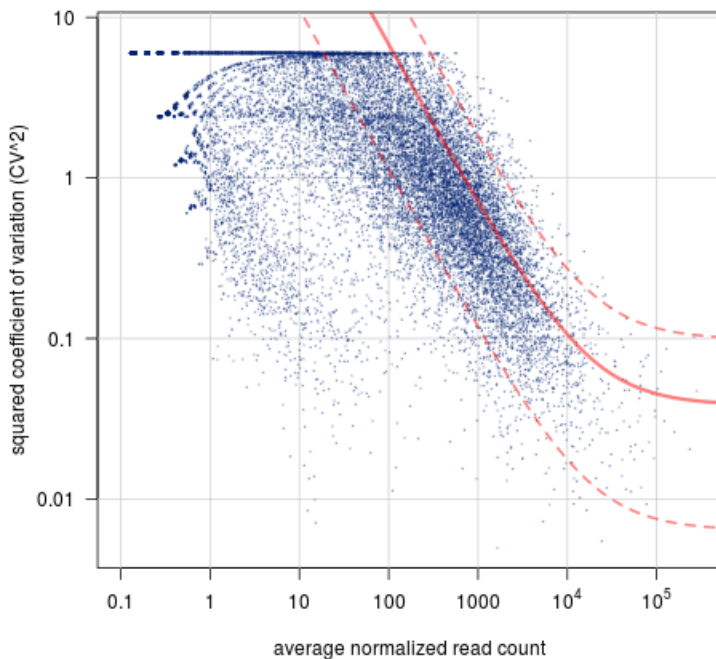

### 3.5 Testing plant genes for high variance

First the sample moments.

```
meansAt <- rowMeans( nCountsAt )
varsAt <- rowVars( nCountsAt )
cv2At <- varsAt / meansAt^2
```

Next, calculate  $\Psi + a_1 * \Theta$ .

```
psialtheta <- mean( 1 / sfAt ) + a1 * mean( sfHeLa / sfAt )
```

We again test the null hypothesis that the biological CV is below 50%.

```
minBiolDisp <- .5^2
```

Calculate Omega, then perform the test

```
m <- ncol( countsAt )
cv2th <- a0 + minBiolDisp + a0 * minBiolDisp
testDenom <- ( meansAt * psialtheta + meansAt^2 * cv2th ) / ( 1 + cv2th/m )
p <- 1 - pchisq( varsAt * (m-1) / testDenom, m-1 )
```

Adjust for multiple testing, cut at 10%:

```
padj <- p.adjust( p, "BH" )
sig <- padj < .1
sig[is.na(sig)] <- FALSE
table( sig )
```

```
sig
```

```
FALSE TRUE
33538 64
```

### 3.5.1 Plot

Same code as before, now to produce Supplementary Figure 8b.

```
# Prepare plot in the same manner as before
plot( NULL, xaxt="n", yaxt="n",
      log="xy", xlim = c( 1e-1, 3e5 ), ylim = c( .005, 8 ),
      xlab = "average normalized read count", ylab = "squared coefficient of variation (CV^2)"
axis( 1, 10^(-1:5), c( "0.1", "1", "10", "100", "1000",
                      expression(10^4), expression(10^5) ) )
axis( 2, 10^(-2:1), c( "0.01", "0.1", "1", "10" ), las=2 )
abline( h=10^(-2:1), v=10^(-1:5), col="#D0D0D0" )

# Plot the plant genes, use a different color if they are highly variable
points( meansAt, cv2At, pch=20, cex=.2,
        col = ifelse( padj < .1, "#C0007090", colAt ) )

# Add the technical noise fit, as before
xg <- 10^seq( -2, 6, length.out=1000 )
lines( xg, (xi+a1)/xg + a0, col="#FF000080", lwd=3 )

# Add a curve showing the expectation for the chosen biological CV^2 threshold
lines( xg, psialtheta/xg + a0 + minBiolDisp, lty="dashed", col="#C0007090", lwd=3 )
```

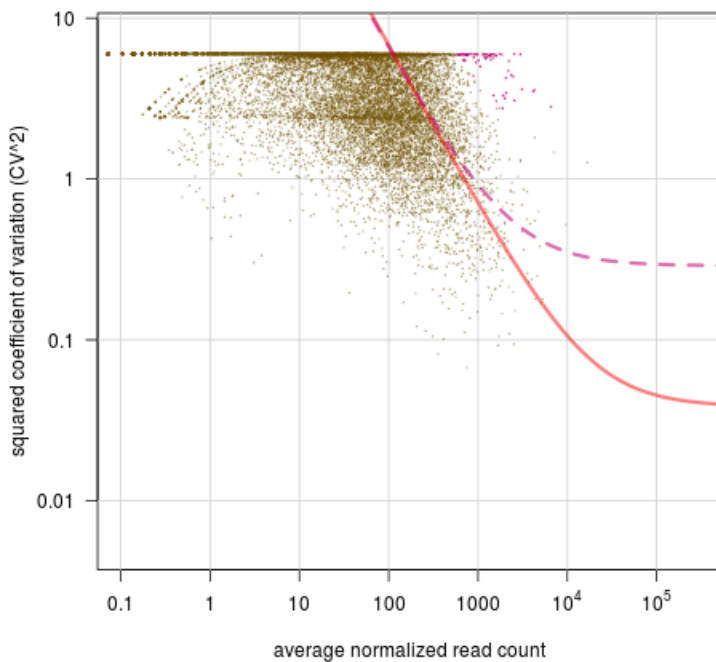

### 3.6 Table of highly variable genes

Write out Supplementary Table 3.

```
log2RelExprAt <- log2( nCountsAt / meansAt )

highVarTable <- data.frame(
  row.names = NULL,
```



```

geneID = rownames(countsAt)[ sig ],
geneSymbol = geneSymbolsAt[ sig ],
meanNormCount = meansAt[ sig ],
strongest = factor( colnames( log2RelExprAt ) [
  apply( log2RelExprAt[ sig, ], 1, which.max ) ] ),
log2RelExprAt[ sig, ],
check.names=FALSE )

head( highVarTable )

```

|   | geneID    | geneSymbol | meanNormCount | strongest | QC1        | QC2       | QC3       | QC4        |    |
|---|-----------|------------|---------------|-----------|------------|-----------|-----------|------------|----|
| 1 | AT1G02500 | AtSAM1     | 1600.104      | QC2       | -1.488582  | 2.182097  | -2.665379 | -1.787801  | -0 |
| 2 | AT1G02690 | IMPA-6     | 1478.025      | QC3       | -3.469101  | -7.638737 | 2.549669  | -5.054241  | -6 |
| 3 | AT1G02730 | ATCSLD5    | 1842.709      | QC3       | -10.521968 | -8.541857 | 2.577869  | -10.473936 | -5 |
| 4 | AT1G03780 | AtTPX2     | 1308.925      | QC3       | -5.706594  | -4.545911 | 2.564255  | -11.565453 | -5 |
| 5 | AT1G06760 | AT1G06760  | 4292.894      | QC5       | -12.742090 | -3.410304 | -1.912597 | -2.691243  | 2  |
| 6 | AT1G07790 | HTB1       | 1240.020      | QC5       | -3.458650  | -9.555354 | -Inf      | -4.995580  | 2  |
|   |           |            |               | QC6       |            |           |           |            |    |
| 1 |           |            |               |           | -7.7962823 |           |           |            |    |
| 2 |           |            |               |           | -7.6817881 |           |           |            |    |
| 3 |           |            |               |           | -7.3218736 |           |           |            |    |
| 4 |           |            |               |           | -7.2434655 |           |           |            |    |
| 5 |           |            |               |           | -0.6164412 |           |           |            |    |
| 6 |           |            |               |           | -9.7504081 |           |           |            |    |

Write out the table

```
write.csv( highVarTable, file="highly_variant_genes_QC.tsv", row.names=FALSE )
```

### 3.7 GO analysis

The TopGo analysis, as before.

This time, we include only genes with an average count above 600.

```
minCountForEnrichment <- 600
```

The work function, as before.

```

topGOAnalysis <- function( geneIDs, inUniverse, inSelection )
  sapply( c( "MF", "BP", "CC" ), function( ont ) {
    alg <- factor( as.integer( inSelection[inUniverse] ) )
    names(alg) <- geneIDs[inUniverse]
    tgd <- new( "topGOdata", ontology=ont, allGenes = alg, nodeSize=5,
      annot=annFUN.org, mapping="org.At.tair.db" )
    resultTopGO <- runTest(tgd, algorithm = "elim", statistic = "Fisher" )
    GenTable( tgd, resultTopGO, topNodes=15 ) },
  simplify=FALSE )

```

The analysis.

```

goResults <-
  topGOAnalysis(
    rownames(countsAt),
    meansAt >= minCountForEnrichment & !is.na(padj),
    padj < .1 )

```

#### 3.7.1 Results:

```
goResults[["MF"]]
```

|    | GO.ID      | Term                                        | Annotated | Significant | Expected | result |
|----|------------|---------------------------------------------|-----------|-------------|----------|--------|
| 1  | GO:0016538 | cyclin-dependent protein kinase regulato... | 5         | 5           | 0.59     |        |
| 2  | GO:0003777 | microtubule motor activity                  | 5         | 5           | 0.59     |        |
| 3  | GO:0003677 | DNA binding                                 | 65        | 19          | 7.66     |        |
| 4  | GO:0019901 | protein kinase binding                      | 7         | 5           | 0.83     | 0.0    |
| 5  | GO:0009055 | electron carrier activity                   | 8         | 4           | 0.94     | 0.0    |
| 6  | GO:0046906 | tetrapyrrole binding                        | 10        | 4           | 1.18     | 0.0    |
| 7  | GO:0020037 | heme binding                                | 10        | 4           | 1.18     | 0.0    |
| 8  | GO:0005506 | iron ion binding                            | 12        | 4           | 1.41     | 0.0    |
| 9  | GO:0016705 | oxidoreductase activity, acting on paire... | 10        | 3           | 1.18     | 0.0    |
| 10 | GO:0019825 | oxygen binding                              | 6         | 2           | 0.71     | 0.0    |
| 11 | GO:0005200 | structural constituent of cytoskeleton      | 6         | 2           | 0.71     | 0.0    |
| 12 | GO:0005488 | binding                                     | 320       | 47          | 37.72    | 0.0    |
| 13 | GO:0019899 | enzyme binding                              | 10        | 6           | 1.18     | 0.0    |
| 14 | GO:0016765 | transferase activity, transferring alkyl... | 10        | 2           | 1.18     | 0.0    |
| 15 | GO:0032559 | adenyl ribonucleotide binding               | 72        | 10          | 8.49     | 0.0    |

```
goResults[["CC"]]
```

|    | GO.ID      | Term                                     | Annotated | Significant | Expected | result |
|----|------------|------------------------------------------|-----------|-------------|----------|--------|
| 1  | GO:0000786 | nucleosome                               | 21        | 16          | 2.38     | 1.2e-  |
| 2  | GO:0005874 | microtubule                              | 12        | 5           | 1.36     | 0.00   |
| 3  | GO:0005634 | nucleus                                  | 152       | 24          | 17.24    | 0.02   |
| 4  | GO:0005694 | chromosome                               | 26        | 18          | 2.95     | 0.05   |
| 5  | GO:0009579 | thylakoid                                | 9         | 3           | 1.02     | 0.07   |
| 6  | GO:0031984 | organelle subcompartment                 | 5         | 2           | 0.57     | 0.10   |
| 7  | GO:0043227 | membrane-bounded organelle               | 297       | 38          | 33.68    | 0.13   |
| 8  | GO:0043231 | intracellular membrane-bounded organelle | 297       | 38          | 33.68    | 0.13   |
| 9  | GO:0045298 | tubulin complex                          | 7         | 2           | 0.79     | 0.18   |
| 10 | GO:0044427 | chromosomal part                         | 25        | 17          | 2.84     | 0.29   |
| 11 | GO:0031981 | nuclear lumen                            | 68        | 9           | 7.71     | 0.35   |
| 12 | GO:0009505 | plant-type cell wall                     | 11        | 2           | 1.25     | 0.36   |
| 13 | GO:0043233 | organelle lumen                          | 70        | 9           | 7.94     | 0.39   |
| 14 | GO:0070013 | intracellular organelle lumen            | 70        | 9           | 7.94     | 0.39   |
| 15 | GO:0031974 | membrane-enclosed lumen                  | 70        | 9           | 7.94     | 0.39   |

```
goResults[["BP"]]
```

|    | GO.ID      | Term                                        | Annotated | Significant | Expected | result |
|----|------------|---------------------------------------------|-----------|-------------|----------|--------|
| 1  | GO:0006334 | nucleosome assembly                         | 23        | 16          | 2.74     | 3.0    |
| 2  | GO:0051322 | anaphase                                    | 15        | 10          | 1.79     | 5.0    |
| 3  | GO:0051567 | histone H3-K9 methylation                   | 16        | 10          | 1.91     | 1.0    |
| 4  | GO:0016572 | histone phosphorylation                     | 11        | 8           | 1.31     | 3.0    |
| 5  | GO:0008283 | cell proliferation                          | 29        | 15          | 3.45     | 6.0    |
| 6  | GO:0000911 | cytokinesis by cell plate formation         | 26        | 12          | 3.10     | 7.0    |
| 7  | GO:0000079 | regulation of cyclin-dependent protein k... | 5         | 5           | 0.60     | 2.0    |
| 8  | GO:0051225 | spindle assembly                            | 6         | 5           | 0.71     | 0.0    |
| 9  | GO:0007018 | microtubule-based movement                  | 12        | 7           | 1.43     | 0.0    |
| 10 | GO:0010583 | response to cyclopentenone                  | 10        | 6           | 1.19     | 0.0    |
| 11 | GO:0000087 | M phase of mitotic cell cycle               | 10        | 6           | 1.19     | 0.0    |
| 12 | GO:0010389 | regulation of G2/M transition of mitotic... | 5         | 4           | 0.60     | 0.0    |
| 13 | GO:0006275 | regulation of DNA replication               | 8         | 5           | 0.95     | 0.0    |
| 14 | GO:0000226 | microtubule cytoskeleton organization       | 23        | 12          | 2.74     | 0.0    |
| 15 | GO:0006306 | DNA methylation                             | 13        | 6           | 1.55     | 0.0    |

### 3.8 Heatmap

The code to produce the heatmap (Supplementary Figure 9b), exactly as before.

```
pixelHeatmap <- function( m, zlim=range(m), col=colorRampPalette(c("blue","orange"))(100),
  pxWidth=1, pxHeight=1 ) {
  col <- col2rgb(col)/255
```

```

mn <- ( m - zlim[1] ) / ( zlim[2] - zlim[1] )
mn[ mn<0 ] <- 0
mn[ mn>1 ] <- 1
mn <- 1 + round( mn * (ncol(col)-1) )
a <- array( NA_real_, c( nrow(m)*pxWidth, ncol(m)*pxHeight, 3 ) )
for( i in 1:nrow(mn) )
  for( j in 1:ncol(mn) )
    a[ ((i-1)*pxWidth)+1 : (i*pxWidth), ((j-1)*pxHeight)+1 : (j*pxHeight), ] <-
      rep( col[ , mn[ i, j ] ] , each = pxWidth*pxHeight )
  Image( a, colormode="color" )
}

relSig <- log2RelExprAt[ sig, ]
relSig[ relSig < -4 ] <- -4
ord <- hclust(dist(relSig))$order
hmSig <- pixelHeatmap( t( relSig[ord,] ), zlim=c( -3, 3 ), pxWidth=30,
  col=colorRampPalette(c("blue","gray","red"))(100) )

```

This time, we use these GO terms:

```

someGOTerms <- c( "GO:0009684", "GO:0003777", "GO:0016538", "GO:0051322",
  "GO:0051567", "GO:0000911", "GO:0003677", "GO:0000786" )

unnamed( t( sapply( someGOTerms, function(x) toTable(GOTERM[ x ])[1,2:3] ) ) )

```

```

  [,1]      [,2]
[1,] "GO:0009684" "indoleacetic acid biosynthetic process"
[2,] "GO:0003777" "microtubule motor activity"
[3,] "GO:0016538" "cyclin-dependent protein kinase regulator activity"
[4,] "GO:0051322" "anaphase"
[5,] "GO:0051567" "histone H3-K9 methylation"
[6,] "GO:0000911" "cytokinesis by cell plate formation"
[7,] "GO:0003677" "DNA binding"
[8,] "GO:0000786" "nucleosome"

```

Make the second heatmap, put it next to the first, and save the image.

```

sigInGO <- sapply( unnamed(someGOTerms), function(go)
  rownames(countsAt)[sig] %in% org.At.tairGO2TAIR[[ go ] ] )

hmGO <- pixelHeatmap( t(sigInGO[ ord, ]), col=c( "lightgray", "darkgreen" ), pxWidth=20 )

spacer <- Image( array( .9, 30 * 3 * sum(sig), dim=c( 30, sum(sig), 3 ) ), colormode="color" )

writeImage(
  Image( abind::abind( hmSig, spacer, hmGO, along=1 ), colormode="color" ),
  files="heatmap_QC.png" )

```

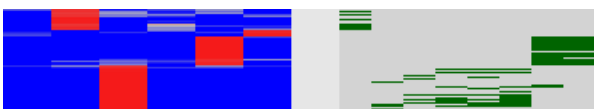

Save the current state.

```

save.image( "QC_analysis_image.RData" )

```

## 4 Analysis of the mouse cells

### 4.1 Count table and normalization

The count table for the mouse data can be found in Supplementary Table 5:

```
dataMouse <- read.csv( "Supplementary_Table_5.csv", row.names=1 )
dataMouse[ 1:10, 1:5 ]
```

|            | length | cell_01 | cell_02 | cell_03 | cell_04 |
|------------|--------|---------|---------|---------|---------|
| ERCC-00002 | 1061   | 13442   | 39379   | 6800    | 9697    |
| ERCC-00003 | 1023   | 207     | 0       | 33      | 888     |
| ERCC-00004 | 523    | 2762    | 6710    | 2526    | 2375    |
| ERCC-00009 | 984    | 8       | 6125    | 217     | 5       |
| ERCC-00012 | 994    | 0       | 0       | 0       | 0       |
| ERCC-00013 | 808    | 0       | 0       | 0       | 0       |
| ERCC-00014 | 1957   | 0       | 0       | 0       | 0       |
| ERCC-00016 | 844    | 0       | 0       | 0       | 0       |
| ERCC-00017 | 1136   | 0       | 0       | 0       | 0       |
| ERCC-00019 | 644    | 0       | 1381    | 0       | 0       |

Again, we split the table into two sub-tables, one with the ERCC spikes, (countsERCC), one with the mouse genes (countsMmus). The first column, with the transcript length, is set aside.

```
geneTypes <- factor( c( Mm="Mmus", ER="ERCC" ) [
  substr( rownames(dataMouse), 1, 2 ) ] )
countsMmus <- dataMouse[ which( geneTypes=="Mmus" ), -1 ]
countsERCC <- dataMouse[ which( geneTypes=="ERCC" ), -1 ]
lengthsMmus <- dataMouse[ which( geneTypes=="Mmus" ), 1 ]
lengthsERCC <- dataMouse[ which( geneTypes=="ERCC" ), 1 ]
```

#### Calculate size factors

```
sfMmus <- estimateSizeFactorsForMatrix( countsMmus )
sfERCC <- estimateSizeFactorsForMatrix( countsERCC )
rbind( sfMmus, sfERCC )
```

|        | cell_01   | cell_02    | cell_03   | cell_04   | cell_05   | cell_08    | cell_09   | cell_10    | cell_11   |
|--------|-----------|------------|-----------|-----------|-----------|------------|-----------|------------|-----------|
| sfMmus | 1.054806  | 0.8631698  | 1.314802  | 0.8392654 | 1.923025  | 2.038466   | 0.9484543 | 1.318534   | 0.9377162 |
| sfERCC | 1.341199  | 3.5780220  | 1.001075  | 1.0414057 | 1.258551  | 0.714875   | 0.5333393 | 1.178008   | 1.6108530 |
|        | cell_12   | cell_13    | cell_14   | cell_15   | cell_16   | cell_17    | cell_18   | cell_19    | cell_20   |
| sfMmus | 1.0650922 | 0.05676978 | 0.7071812 | 1.508444  | 1.5083955 | 1.6092835  | 1.348358  | 0.7929501  | 1.575111  |
| sfERCC | 0.4885753 | 3.90732773 | 1.0575947 | 1.088776  | 0.3442378 | 0.9069057  | 1.019297  | 1.6010922  | 0.446111  |
|        | cell_21   | cell_22    | cell_23   | cell_24   | cell_25   | cell_26    | cell_27   | cell_28    | cell_29   |
| sfMmus | 1.1275932 | 0.7125047  | 0.2097335 | 1.2002740 | 1.2652195 | 0.09265965 | 1.6101646 | 1.5289089  | 0.610111  |
| sfERCC | 0.9001471 | 1.9687150  | 1.6600806 | 0.5552053 | 0.7471373 | 3.73041540 | 0.9049005 | 0.9355409  | 2.710111  |
|        | cell_30   | cell_31    | cell_32   | cell_33   | cell_34   | cell_35    | cell_36   | cell_37    | cell_38   |
| sfMmus | 0.8833294 | 1.6117294  | 0.9131230 | 0.6266095 | 0.4910416 | 1.231094   | 0.9456337 | 0.4741488  | 1.626111  |
| sfERCC | 0.2198629 | 0.6530132  | 0.1959819 | 1.4602831 | 3.7636827 | 1.771898   | 0.1028514 | 2.7608761  | 0.694111  |
|        | cell_39   | cell_40    | cell_41   | cell_42   | cell_43   | cell_44    | cell_45   | cell_46    | cell_47   |
| sfMmus | 2.067016  | 1.5703639  | 2.2319662 | 1.531569  | 0.4751253 | 1.433638   | 1.4033780 | 1.509945   | 1.385977  |
| sfERCC | 1.936887  | 0.3855543  | 0.7174266 | 1.316699  | 3.2065296 | 0.851406   | 0.3767175 | 1.511495   | 0.422995  |
|        | cell_48   | cell_49    | cell_50   | cell_51   | cell_52   | cell_53    | cell_54   | cell_55    | cell_56   |
| sfMmus | 0.9752096 | 1.7122014  | 1.395363  | 2.029381  | 0.4192704 | 1.733174   | 2.007804  | 1.6556897  | 1.551027  |
| sfERCC | 0.4137318 | 0.3755807  | 2.453767  | 2.088099  | 1.8768628 | 1.515678   | 1.754392  | 0.8157246  | 0.307815  |
|        | cell_57   | cell_58    | cell_59   | cell_60   | cell_61   | cell_62    | cell_63   | cell_64    | cell_65   |
| sfMmus | 1.8791183 | 1.8109205  | 2.0053160 | 0.5212242 | 1.286422  | 1.7020164  | 2.2123285 | 0.1373123  | 1.710111  |
| sfERCC | 0.7091403 | 0.6844449  | 0.7593432 | 0.7342300 | 1.234711  | 0.4970688  | 0.9522804 | 13.6460462 | 1.620111  |
|        | cell_66   | cell_67    | cell_68   | cell_69   | cell_70   | cell_71    | cell_72   | cell_73    | cell_74   |
| sfMmus | 1.725958  | 1.4598322  | 1.674938  | 1.5899826 | 1.4466890 | 1.0997875  | 0.8398078 | 1.734892   | 1.23888   |
| sfERCC | 2.499659  | 0.7241718  | 1.702510  | 0.4682272 | 0.4076763 | 0.1952154  | 6.2377984 | 1.656883   | 0.85136   |
|        | cell_76   | cell_77    | cell_78   | cell_79   | cell_80   | cell_81    | cell_82   | cell_83    | cell_84   |
| sfMmus | 0.9557100 | 1.2679037  | 0.7024893 | 1.6270177 | 1.509954  | 1.6773127  | 1.875683  | 0.633388   | 2.58677   |
| sfERCC | 0.6596151 | 0.5664658  | 1.1481714 | 0.8049232 | 6.085711  | 0.5256015  | 2.378635  | 3.469949   | 0.90372   |
|        | cell_85   | cell_86    | cell_87   | cell_88   | cell_89   | cell_90    | cell_91   | cell_94    | cell_95   |
| sfMmus | 0.3708505 | 1.964748   | 1.7201196 | 2.022113  | 1.324386  | 1.131953   | 0.9803028 | 1.369537   | 1.71133   |
| sfERCC | 3.1826913 | 1.139850   | 0.9348608 | 1.020459  | 1.204492  | 1.308119   | 0.9468956 | 2.970329   | 1.65396   |

Normalize by them:

```
nCountsERCC <- t( t(countsERCC) / sfERCC )
nCountsMmus <- t( t(countsMmus) / sfMmus )
```

We calculate the sample moments:

```
meansERCC <- rowMeans( nCountsERCC )
varsERCC <- rowVars( nCountsERCC )
cv2ERCC <- varsERCC / meansERCC^2

meansMmus <- rowMeans( nCountsMmus )
varsMmus <- rowVars( nCountsMmus )
cv2Mmus <- varsMmus / meansMmus^2
```

Normalize the mean counts by transcrip length (i.e., "per kilobase", "PK"), too:

```
meansERCCPK <- meansERCC / lengthsERCC * 1e3
meansMmusPK <- meansMmus / lengthsMmus * 1e3
```

## 4.2 Fit technical noise

We perform the fit as usual. However, as we have only rather few spikes, we have to be a bit more generous with the mean cut-off, now using the 80-percentile instead of the 95-percentile.

```
minMeanForFitA <- unname( quantile( meansERCC[ which( cv2ERCC > .3 ) ], .8 ) )
useForFitA <- meansERCC >= minMeanForFitA
minMeanForFitA
table( useForFitA )
```

```
[1] 81.63606
useForFitA
FALSE TRUE
  71    21
```

Afterwards, we will compare with a fit using length-normalized counts. We prepare by finding the minimum for these, too:

```
minMeanForFitB <- unname( quantile( meansERCCPK[ which( cv2ERCC > .3 ) ], .8 ) )
useForFitB <- meansERCCPK >= minMeanForFitB
minMeanForFitB
table( A=useForFitA, B=useForFitB )
```

```
[1] 100.2707
      B
A      FALSE TRUE
FALSE   70    1
TRUE    1    20
```

Note that the two lists overlap well.

We perform both fits.

```
fitA <- glmgam.fit( cbind( a0 = 1, altilde = 1/meansERCC[useForFitA] ),
  cv2ERCC[useForFitA] )

fitB <- glmgam.fit( cbind( a0 = 1, altilde = 1/meansERCCPK[useForFitB] ),
  cv2ERCC[useForFitB] )
```

How much variance do the two fits explain?

```
residualA <- var( log( fitted.values(fitA) ) - log( cv2ERCC[useForFitA] ) )
```

```
totalA <- var( log( cv2ERCC[useForFitA] ) )

residualB <- var( log( fitted.values(fitB) ) - log( cv2ERCC[useForFitB] ) )
totalB <- var( log( cv2ERCC[useForFitB] ) )

# explained variances of log CV^2 values
c( A = 1 - residualA / totalA,
  B = 1 - residualB / totalB )
```

|  | A         | B         |
|--|-----------|-----------|
|  | 0.7945620 | 0.8873808 |

Fit B, which used the length-normalized counts, performed better.

As a second check, we plot both fits.

```
par( mfrow=c(1,2) )

plot( meansERCC, cv2ERCC, log="xy", col=1+useForFitA, main="A" )
xg <- 10^seq( -3, 5, length.out=100 )
lines( xg, coefficients(fitA)["a0"] + coefficients(fitA)["altilde"]/xg )
segments( meansERCC[useForFitA], cv2ERCC[useForFitA],
  meansERCC[useForFitA], fitA$fitted.values, col="gray" )

plot( meansERCCPK, cv2ERCC, log="xy", col=1+useForFitB, main="B" )
lines( xg, coefficients(fitB)["a0"] + coefficients(fitB)["altilde"]/xg )
segments( meansERCCPK[useForFitB], cv2ERCC[useForFitB],
  meansERCCPK[useForFitB], fitB$fitted.values, col="gray" )
```

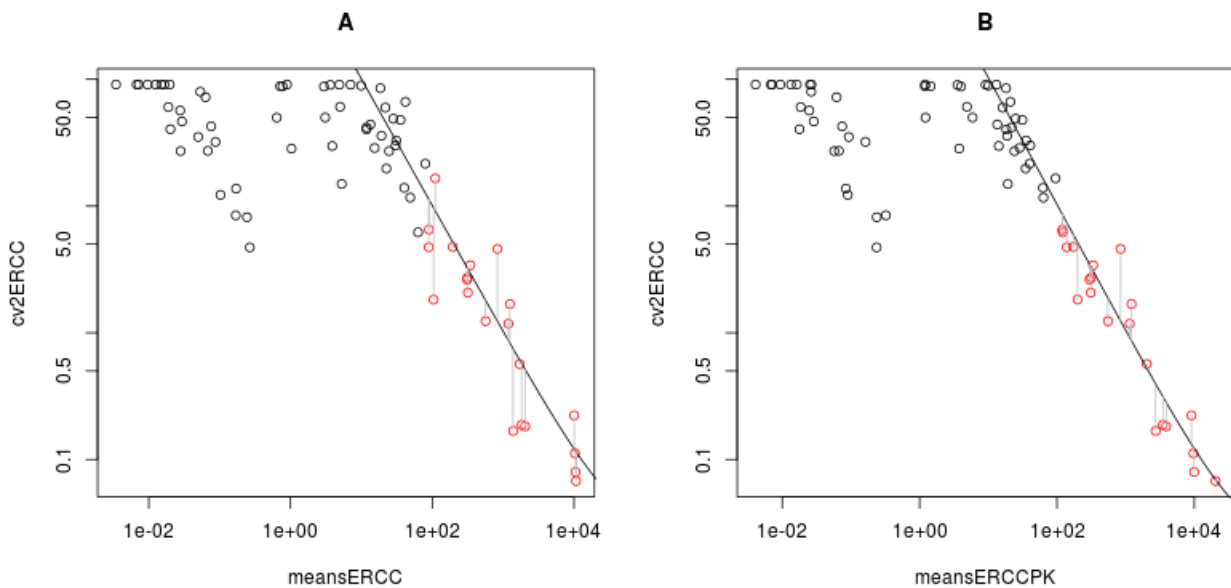

### 4.3 Test for high variance

We start with the test using fit A:

```
minBiolDisp <- .5^2

xi <- mean( 1 / sfERCC )
m <- ncol( countsMmus )
psialthetaA <- mean( 1 / sfERCC ) +
  ( coefficients(fitA)["altilde"] - xi ) * mean( sfERCC / sfMmus )
cv2thA <- coefficients(fitA)["a0"] + minBiolDisp + coefficients(fitA)["a0"] * minBiolDisp
```

```
testDenomA <- ( meansMmus * psialthetaA + meansMmus^2 * cv2thA ) / ( 1 + cv2thA/m )

pA <- 1 - pchisq( varsMmus * (m-1) / testDenomA, m-1 )
padjA <- p.adjust( pA, "BH" )

table( padjA < .1 )
```

```
FALSE TRUE
29489 1198
```

Using fit B and the length-normalized counts, we get

```
varsMmusPK <- rowVars( nCountsMmus / lengthsMmus * 1e3 )

psialthetaB <- mean( 1 / sfERCC ) +
  ( coefficients(fitB)["altilde"] - xi ) * mean( sfERCC / sfMmus )
cv2thB <- coefficients(fitB)["a0"] + minBiolDisp + coefficients(fitB)["a0"] * minBiolDisp
testDenomB <- ( meansMmusPK * psialthetaB + meansMmusPK^2 * cv2thB ) / ( 1 + cv2thB/m )

pB <- 1 - pchisq( varsMmusPK * (m-1) / testDenomB, m-1 )
padjB <- p.adjust( pB, "BH" )

table( B = padjB < .1 )
```

```
B
FALSE TRUE
30137 523
```

Despite the better technical noise fit in case B (length adjusted), we get more results in case A (not length adjusted). The next section explores this.

#### 4.4 A diagnostic plot

We have a closer look at the reliability of the technical noise predictions from fit A. The variance from technical noise, predicted for a biological gene is given by  $\Omega(0, \mu)$ , where  $\mu$  is the normalized mean count for the gene, and  $\Omega$  is the function defined in the Online Methods. Dividing by  $\mu^2$  to get  $CV^2$  values (and ignoring the negligible term  $a_0/m$ ), we get

```
predictedNoiseCV2 <- psialthetaA / meansMmus + coefficients(fitA)["a0"]
```

We plot the ratio of observed total  $CV^2$  to predicted technical  $CV^2$  against transcript length, using only genes with a mean count above the cut-off also used for the fit. This is Supplementary Figure 7.

```
useInPlot <- meansMmus > minMeanForFitA
plot( lengthsMmus[useInPlot], ( cv2Mmus / predictedNoiseCV2 )[useInPlot], log="xy",
      pch=20, cex=.2, col = "#705000A0", xlab = "length", ylab="total variance / predicted noi:
points( lengthsERCC[useForFitA], cv2ERCC[useForFitA] / fitted.values(fitA), pch=20, cex=1, <
```

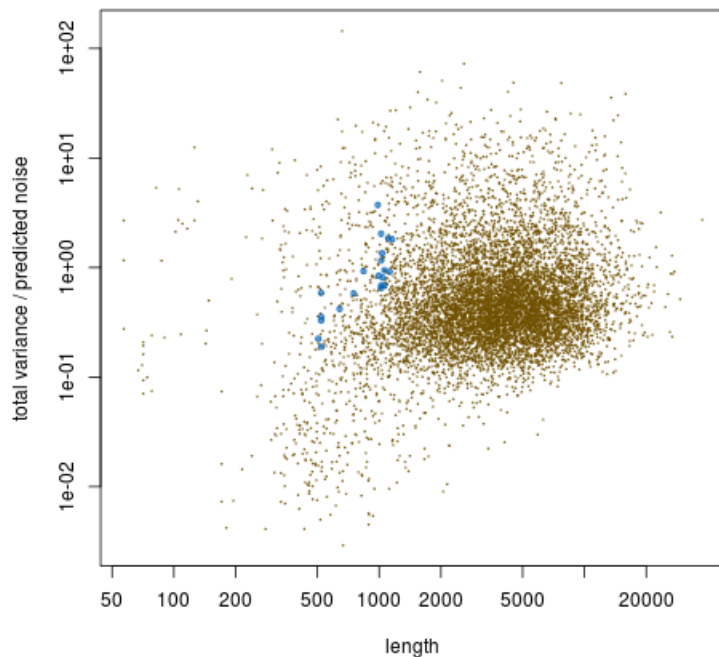

See Supplementary Note 5 for a discussion.

#### 4.5 Plot of results

To produce Figure 3, which depicts the results of fit and test A, the following code was used

```

plot( NULL, xaxt="n", yaxt="n",
      log="xy", xlim = c( 1e-1, 3e5 ), ylim = c( .005, 100 ),
      xlab = "average normalized read count", ylab = "squared coefficient of variation (CV^2)",
      axis( 1, 10^(-1:5), c( "0.1", "1", "10", "100", "1000",
                            expression(10^4), expression(10^5) ) )
      axis( 2, 10^(-2:2), c( "0.01", "0.1", "1", "10", "100" ), las=2 )
      abline( h=10^(-2:1), v=10^(-1:5), col="#D0D0D0", lwd=2 )

# Plot the plant genes, use a different color if they are highly variable
points( meansMmus, cv2Mmus, pch=20, cex=.2,
        col = ifelse( padjA < .1, "#C0007090", "#70500040" ) )

# Add the technical noise fit, as before
xg <- 10^seq( -2, 6, length.out=1000 )
lines( xg, coefficients(fitA)["a_tilde"] / xg + a0, col="#FF000080", lwd=3 )

# Add a curve showing the expectation for the chosen biological CV^2 threshold
lines( xg, psialthetaA/xg + coefficients(fitA)["a0"] + minBiolDisp,
      lty="dashed", col="#C0007090", lwd=3 )

# Add the normalised ERCC points
points( meansERCC, cv2ERCC, pch=20, cex=1, col="#0060B8A0" )

```



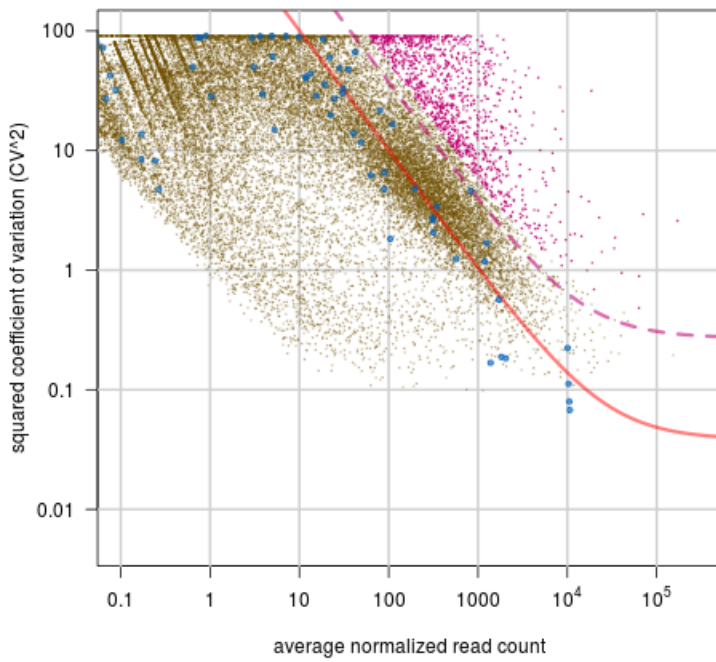

Save image:

```
save.image( "mouse_analysis_image.RData" )
```

Date: 2013-08-08 11:03:10 CEST

Author: Simon Anders

Org version 7.8.02 with Emacs version 23

[Validate XHTML 1.0](#)
